# Supplementary material
Source: publisher figshare collection journal article supplement (https://acs.figshare.com/ndownloader/files/5184265)
Supplement: Supplementary file 1 [file 5184265]

## Supporting Information

### **Synthesis and biological evaluation of novel chloroethylaminoanthraquinones with potent cytotoxic activity against cisplatin resistant tumour cells**

Klaus Pors, Zennia Paniwnyk,<sup>†</sup> Ketan C. Ruparelia,<sup>†</sup> Paul H. Teesdale-Spittle,<sup>†</sup> John A. Hartley,<sup>‡</sup> Lloyd R. Kelland,<sup>⊗</sup> and Laurence H. Patterson.\*

#### **Contents**

|                                                  |          |
|--------------------------------------------------|----------|
| Experimental Section                             | p. S2-S7 |
| Figure 1: Autoradiograph of DNA crosslinking gel | p. S8    |
| Scheme 1: Route to synthesis of anthraquinones   | p. S8    |

## Experimental Section

The UV/Vis absorbance of the compounds investigated biologically was recorded on a Beckman DU70 UV/Vis Spectrophotometer fitted with deuterium and tungsten lamps. The infra-red absorbance was recorded on a Nicolet 205 FT-IR Spectrometer. NMR spectra were obtained on a Bruker AC-250 spectrometer. Fast Atom Bombardment (FAB+) Mass-Spectra sample identification was obtained on a V.G 70 SEQ Mass Spectrometer. Micro-elemental analysis was obtained using a Carlo-Erba EA 1108 instrument with a PC-based data system, Eager 200 for Windows and Sartorius ultra micro-balance 4504 MP8. Thin-layer chromatography was carried out on aluminium-backed silica plates (Merck, 60 F<sub>254</sub>), and column chromatography on silica gel (particle size 20-35  $\mu$ m).

### 1,4-Bis-[[2-[bis(2-hydroxyethyl)amino]ethyl]amino]anthracene-9,10-dione (1)

Reaction procedure and conditions follow that for the synthesis of **3**, using *N,N*-bis(2-hydroxyethyl)ethylenediamine (3.7 g, 20.0 mmol) and leucoquinizarin (0.3 g, 1.26 mmol). Purification by flash column chromatography (CH<sub>3</sub>OH:CH<sub>2</sub>Cl<sub>2</sub>, 1:1) afforded the product as dark blue crystals (132.3 mg, 22% yield). m.p. 177.5 - 178.9°C; <sup>1</sup>H NMR (CDCl<sub>3</sub>/CD<sub>3</sub>OD) peaks:  $\delta$  3.4 (t, 8H, 4 $\times$ CH<sub>2</sub>N), 3.5 (t, 4H, 2 $\times$ CH<sub>2</sub>N), 3.85 (q, 4H, 2 $\times$ CH<sub>2</sub>NHAr), 4.0 (t, 8H, 4 $\times$ CH<sub>2</sub>OH), 7.7 (s, 2H, ArH), 7.85 (m, 2H, ArH), 8.3 (m, 2H, ArH), 10.4 (t, 2H, 2 $\times$ NHAr); IR  $\nu_{\max}$  (KBr) cm<sup>-1</sup>: 3600-3300 (OH), 1590 (C=O), 1230 (N-H); E <sub>$\lambda$</sub>  (dH<sub>2</sub>O) = 8060 cm<sup>-1</sup>;  $\lambda_{\max}$  (624 nm); FAB-MS, m/z (M+H)<sup>+</sup> 501; Anal. (C<sub>26</sub>H<sub>36</sub>N<sub>4</sub>O<sub>6</sub>) C, H, N.

### 1,4-Bis-[[3-[bis(2-hydroxyethyl)amino]propyl]amino]anthracene-9,10-dione (2)

Reaction conditions and procedure follow that for the synthesis of **3**, using *N,N*-bis(2-hydroxyethyl)-1,3-propanediamine (3.64 g, 20.0 mmol) and leucoquinizarin (0.3 g, 1.26 mmol). Purification by flash column chromatography (CH<sub>3</sub>OH:CH<sub>2</sub>Cl<sub>2</sub>, 3:7 increasing to 1:1) afforded the product as dark blue crystals (113.0 mg, 18% yield). m.p. 137.6-138.6°C; <sup>1</sup>H NMR (CDCl<sub>3</sub>/CD<sub>3</sub>OD) peaks:  $\delta$  1.8 (m, 4H, 2 $\times$ CH<sub>2</sub>CH<sub>2</sub>CH<sub>2</sub>), 2.3 (t, 8H, 4 $\times$ CH<sub>2</sub>N), 2.4 (t, 4H, 2 $\times$ CH<sub>2</sub>N), 3.4 (q, 4H, 2 $\times$ CH<sub>2</sub>NHAr), 3.7 (t, 8H, 4 $\times$ CH<sub>2</sub>OH), 7.7 (s, 2H, ArH), 7.85 (m, 2H, ArH), 8.3 (m, 2H, ArH), 10.7 (t, 2H, 2 $\times$ NHAr); IR  $\nu_{\max}$  (KBr) cm<sup>-1</sup>: 3600-3300 (OH), 1590 (C=O), 1230 (N-H); E <sub>$\lambda$</sub>  (dH<sub>2</sub>O) = 9964 cm<sup>-1</sup>;  $\lambda_{\max}$  (630 nm); FAB-MS, m/z (M+H)<sup>+</sup> 529; Anal. (C<sub>28</sub>H<sub>40</sub>N<sub>4</sub>O<sub>6</sub>) C, H, N.

### 1,4-Bis-[[2-[(2-hydroxyethyl)(methyl)amino]ethyl]amino]anthracene-9,10-dione (3)

Leucoquinizarin (0.3 g, 1.26 mmol) was added to *N*-2-hydroxyethyl-*N*-methylethylenediamine (2.44 g, 20.0 mmol) at 60 °C under nitrogen and heated for 4 hours. The reaction mixture was cooled to room temperature, aqueous NaOH (15%, 0.2 cm<sup>3</sup>) was added and the reaction was left to stir overnight exposed to air. The reaction mixture was diluted with CH<sub>2</sub>Cl<sub>2</sub> (80 cm<sup>3</sup>) and washed with water (3 $\times$ 80 cm<sup>3</sup>). The organic layer was dried with MgSO<sub>4</sub> and the solvent was concentrated *in vacuo* to yield a waxy solid. This crude solid was purified by flash column chromatography (CH<sub>3</sub>OH:CH<sub>2</sub>Cl<sub>2</sub>, 1:1 then CH<sub>3</sub>OH) and further by re-dissolving in CH<sub>3</sub>OH followed by precipitation with dry diethyl ether to give dark blue crystals (105.7 mg, 19% yield). m.p. 181.2-182.3°C; <sup>1</sup>H NMR (CDCl<sub>3</sub>/CD<sub>3</sub>OD) peaks:  $\delta$  2.5 (br s, 6H, 2 $\times$ CH<sub>3</sub>N), 2.8 (t, 2H, CH<sub>2</sub>CH<sub>2</sub>N), 3.0 (t, 2H, CH<sub>2</sub>CH<sub>2</sub>N), 3.4 (q, 2H, CH<sub>2</sub>NHAr), 3.7 (t, 2H, CH<sub>2</sub>OH), 7.5 (s, 2H, Ar-H), 7.7 (m, 2H, Ar-H), 8.2 (m, 2H, Ar-NH), 10.7 (t, 2H, 2 $\times$ NHAr); IR  $\nu_{\max}$  (KBr) cm<sup>-1</sup>: 3600-3300 (OH), 1590 (C=O), 1230 (N-H); E <sub>$\lambda$</sub>  (dH<sub>2</sub>O) = 7128 cm<sup>-1</sup>;  $\lambda_{\max}$  (626 nm); FAB-MS, m/z (M+H)<sup>+</sup> 441; Anal. (C<sub>24</sub>H<sub>32</sub>N<sub>4</sub>O<sub>4</sub>) C, H, N.

### 1,4-Bis[[3-[bis(2-hydroxyethyl)amino]propyl]amino]-5,8-dihydroxyanthracene-9,10-dione (4)

Reaction procedure and conditions follow that for the synthesis of **6**, using *N,N*-bis(2-hydroxyethyl)-1,3-propanediamine (2.16 g, 10.0 mmol) and 5,8-dihydroxy-leucoquinizarin (0.2 g, 0.75 mmol). Purification by flash column chromatography (CH<sub>3</sub>OH:CH<sub>2</sub>Cl<sub>2</sub>:NH<sub>3</sub>, 4.5:95:0.5) afforded the product as a dark blue solid (128.1 mg, 31% yield). m.p. 243.4 - 245.2°C; <sup>1</sup>H NMR (CDCl<sub>3</sub>/CD<sub>3</sub>OD) δ: 1.75 (t, 4H, 2× CH<sub>2</sub>CH<sub>2</sub>CH<sub>2</sub>), 2.5 (t, 8H, 4×CH<sub>2</sub>N), 2.6 (t, 4H, 2×CH<sub>2</sub>N), 3.45 (q, 4H, 2×CH<sub>2</sub>NAr), 3.6 (t, 8H, 4×CH<sub>2</sub>OH), 7.2 (s, 2H, ArH), 7.6 (s, 2H, ArH), 10.6 (t, 2H, 2×NHAr); IR ν<sub>max</sub> (KBr) cm<sup>-1</sup> 3600-3300 (OH), 1580 (C=O), 1230 (N-H); E<sub>λ</sub> (dH<sub>2</sub>O) = 9844 cm<sup>-1</sup>; λ<sub>max</sub> (612 nm); FAB-MS, m/z (M+H)<sup>+</sup> 561; Anal. (C<sub>28</sub>H<sub>40</sub>N<sub>4</sub>O<sub>8</sub>) C, H, N.

**1-[[2-[Dimethylamino]ethyl]amino]-4-[[2-(2-(hydroxyethyl)(methyl)amino)ethyl]amino]-5,8-dihydroxyanthracene-9,10-dione (5)**

5,8-Dihydroxy-leucoquinizarin (0.2 g, 0.75 mmol) was added to *N*-2-hydroxyethyl-*N*-methylethylenediamine (0.71 g, 6.0 mmol) at 60 °C under nitrogen and heated for 30 min. *N,N*-dimethylethylenediamine (0.194 g, 2.2 mmol) was added and the reaction mixture was stirred at 80°C for a further 5 hours. After cooling to room temperature, aqueous NaOH (15%, 0.2 cm<sup>3</sup>) was added and the reaction mixture was exposed to air and stirred overnight. The reaction mixture was diluted with CH<sub>2</sub>Cl<sub>2</sub> (80 cm<sup>3</sup>) and washed with water (3×80 cm<sup>3</sup>). The organic layer was dried with MgSO<sub>4</sub> and the solvent was concentrated *in vacuo* to yield a waxy solid. This crude solid was purified by flash column chromatography (CH<sub>3</sub>OH:CH<sub>2</sub>Cl<sub>2</sub>:NH<sub>3</sub>, 4.5:94:0.5). The resulting solid was further purified by re-dissolving in CH<sub>3</sub>OH and precipitation with dry diethyl ether to give the product as dark blue crystals (34.8 mg, 11% yield). m.p. 207.5 - 209.5°C; <sup>1</sup>H NMR (CDCl<sub>3</sub>/CD<sub>3</sub>OD) δ: 2.7 (s, 9H, 3×NCH<sub>3</sub>), 3.1 (t, 4H, 2×CH<sub>2</sub>N), 3.3 (t, 2H, CH<sub>2</sub>N), 3.9 (q, 4H, 2×CH<sub>2</sub>NHAr), 4.1 (t, 2H, CH<sub>2</sub>OH), 7.1 (s, 2H, ArH), 7.3 (s, 2H, ArH), 10.8 (t, 2×H, NHAr); IR ν<sub>max</sub> (KBr) cm<sup>-1</sup> 3600-3300 (OH), 1580 (C=O), 1230 (N-H); E<sub>λ</sub> = 7128 cm<sup>-1</sup>; λ<sub>max</sub> (608 nm); FAB-MS, m/z (M+H)<sup>+</sup> 443; Anal. (C<sub>23</sub>H<sub>30</sub>N<sub>4</sub>O<sub>5</sub>) C, H, N.

**1,4-Bis[[2-[2-(hydroxyethyl)(methyl)amino]ethyl]amino]-5,8-dihydroxyanthracene-9,10-dione (6)**

5,8-Dihydroxy-leucoquinizarin (0.2 g, 0.75 mmol) was added to *N*-2-hydroxyethyl-*N*-methylethylenediamine (1.3 g, 12.0 mmol) at 60 °C under nitrogen and heated for 5 hours. The reaction mixture was cooled to room temperature, aqueous NaOH (2 M, 0.2 cm<sup>3</sup>) was added and the reaction was exposed to air and stirred overnight. The reaction mixture was diluted with CH<sub>2</sub>Cl<sub>2</sub> (80 cm<sup>3</sup>) and washed with water (3×80 cm<sup>3</sup>). The organic layer was dried with MgSO<sub>4</sub> and the solvent was concentrated *in vacuo* to yield a waxy solid. This crude solid was purified by flash column chromatography (CH<sub>3</sub>OH:CH<sub>2</sub>Cl<sub>2</sub>:NH<sub>3</sub>, 5:94:1). The resulting solid was further purified by re-dissolving in CH<sub>3</sub>OH and precipitation with dry diethyl ether to give the product as dark blue crystals (87.1 mg, 25% yield). m.p. 211.3 - 213.5°C; <sup>1</sup>H NMR (CDCl<sub>3</sub>/CD<sub>3</sub>OD) δ: 2.3 (s, 6H, 2×CH<sub>3</sub>N), 2.7 (t, 4H, 2×CH<sub>2</sub>N), 2.8 (t, 4H, 2×CH<sub>2</sub>N), 3.6 (q, 4H, 2×CH<sub>2</sub>NAr), 3.7 (t, 4H, 2×CH<sub>2</sub>OH), 7.2 (s, 2H, ArH), 7.4 (s, 2H, ArH), 10.6 (t, 2H, 2×NHArH); IR ν<sub>max</sub> (KBr) cm<sup>-1</sup> 3600-3300 (OH), 1580 (C=O), 1230 (N-H); E<sub>λ</sub> (dH<sub>2</sub>O) = 14604 cm<sup>-1</sup>; λ<sub>max</sub> (608 nm); FAB-MS, m/z (M+H)<sup>+</sup> 473; Anal. (C<sub>24</sub>H<sub>32</sub>N<sub>4</sub>O<sub>6</sub>) C, H, N.

**1,4-Bis[[2-[bis(2-hydroxyethyl)amino]ethyl]amino]-5,8-dihydroxyanthracene-9,10-dione (8)**

Reaction procedure and conditions follow that for the synthesis of **6**, using *N,N*-bis(2-hydroxyethyl)ethylenediamine (2.0 g, 10 mmol) and 5,8-dihydroxy-leucoquinizarin (0.2 g, 0.75 mmol). Purification by flash column chromatography (CH<sub>3</sub>OH:NH<sub>3</sub>, 99.5:0.5) afforded the product as a dark blue solid (94.2 mg, 24% yield); m.p. 218.5 - 219.5°C; <sup>1</sup>H NMR (CDCl<sub>3</sub>/CD<sub>3</sub>OD) δ: 2.7 (t, 8H, 4×CH<sub>2</sub>N), 2.9 (t, 4H, 2×CH<sub>2</sub>N), 3.5 (q, 4H, 2×CH<sub>2</sub>NAr), 3.7 (t, 8H, 4×CH<sub>2</sub>OH), 7.1 (s, 2H, ArH), 7.3 (s, 2H, ArH), 10.6 (t, 2H, 2×NHAr); IR ν<sub>max</sub> (KBr) cm<sup>-1</sup> 3600-3300 (OH), 1580 (C=O), 1230 (N-H); E<sub>λ</sub> (dH<sub>2</sub>O) = 8876 cm<sup>-1</sup>; λ<sub>max</sub> (606 nm); FAB-MS, m/z (M+H)<sup>+</sup> 533; Anal. (C<sub>26</sub>H<sub>36</sub>N<sub>4</sub>O<sub>8</sub>) C, H, N.

**1-[[2-[2-(Hydroxyethyl)(methyl)amino]ethyl]amino]anthracene-9,10-dione (9)**

To *N*-2-hydroxyethyl-*N*-methylethylenediamine (2.4 g, 0.02 mol) in 2-methoxyethanol (10 cm<sup>3</sup>) was added 1-chloroanthraquinone (0.5 g, 2.05 mmol) and the mixture was refluxed for 6 hours. After evaporation, the resulting waxy solid was diluted with CH<sub>2</sub>Cl<sub>2</sub> (20 cm<sup>3</sup>) and washed with water (3×20 cm<sup>3</sup>) to remove any unreacted amine. Following evaporation, the crude product was lyophilised and subsequently purified by flash column chromatography (CH<sub>2</sub>Cl<sub>2</sub>: EtOH, 9:1). The product was further purified by re-dissolving the product in EtOH and precipitation with dry diethyl ether to give the target compound as a red/orange solid. (100 mg, 15% yield). m.p. 105.9 - 106.8°C; <sup>1</sup>H NMR (CDCl<sub>3</sub>/CD<sub>3</sub>OD) δ: 2.3 (s, 3H, CH<sub>3</sub>N), 2.7 (t, 2H, CH<sub>2</sub>CH<sub>2</sub>N), 2.8 (t, 2H, CH<sub>2</sub>CH<sub>2</sub>N), 3.4 (q, 2H, CH<sub>2</sub>NHAr), 3.7 (t, 2H, CH<sub>2</sub>OH), 7.0 (d, 1H, Ar-H), 7.5 (m, 2H, Ar-H), 7.7 (m, 2H, Ar-H), 8.2 (d, 1H, Ar-H), 8.3 (d, 1H, Ar-H), 10.1 (t, 1H, NHAr); IR ν<sub>max</sub> (KBr) cm<sup>-1</sup>: 3600-3300 (OH), 1650 (C=O), 1040 (N-H); E<sub>λ</sub> (CH<sub>3</sub>OH/DMSO) = 4761 cm<sup>-1</sup>; λ<sub>max</sub> (521 nm); FAB-MS m/z (M+H)<sup>+</sup> 325; Anal. (C<sub>19</sub>H<sub>20</sub>N<sub>2</sub>O<sub>3</sub>) C, H, N.

**1-[[3-[2-(Hydroxyethyl)(methyl)amino]propyl]amino]anthracene-9,10-dione (10)**

Reaction procedure and conditions follow the method for the synthesis of **9**, using 1-chloroanthraquinone (0.2 g, 0.82 mmol) and *N*-2-hydroxyethyl-*N*-methyl-1,3-propanediamine (1.1 g, 8.2 mmol). Purification by flash column chromatography (CH<sub>2</sub>Cl<sub>2</sub>:EtOH, 9:1) yielded the product as a red solid (47.2 mg, 18% yield). m.p. 98.5 - 99.2°C; <sup>1</sup>H NMR (CDCl<sub>3</sub>/CD<sub>3</sub>OD) δ: 1.8 (m, 2H, CH<sub>2</sub>CH<sub>2</sub>CH<sub>2</sub>), 2.3 (s, 3H, CH<sub>3</sub>N), 2.7 (t, 2H, CH<sub>2</sub>N), 2.8 (t, 2H, HNCH<sub>2</sub>CH<sub>2</sub>N), 3.4 (q, 2H, CH<sub>2</sub>NHAr), 3.7 (t, 2H, CH<sub>2</sub>OH), 7.0 (d, 1H, Ar-H), 7.5 (m, 2H, Ar-H), 7.7 (m, 2H, Ar-H), 8.2 (d, 1H, Ar-H), 8.3 (d, 1H, Ar-H), 10.1 (t, 1H, NHAr); IR ν<sub>max</sub> (KBr) cm<sup>-1</sup>: 3600-3300 (OH), 1650 (C=O), 1040 (N-H); E<sub>λ</sub> (CH<sub>3</sub>OH/DMSO) = 3514 cm<sup>-1</sup>; λ<sub>max</sub> (504 nm); FAB-MS, m/z (M+H)<sup>+</sup> 339; Anal. (C<sub>20</sub>H<sub>22</sub>N<sub>2</sub>O<sub>3</sub>) C, H, N.

**1,4-Bis[[2-[bis(2-chloroethyl)amino]ethyl]amino]-5,8-dihydroxyanthracene-9,10-dione dihydrochloride (11)**

Reaction conditions and procedure follow that for the synthesis of **8** (0.05 g, 0.09 mmol), triphenylphosphine (0.147 g, 0.56 mmol) and carbon tetrachloride (0.34 g, 2.25 mmol). The product was isolated as a dark blue solid (45.6 mg, 75% yield). m.p. 191.6 - 192°C; <sup>1</sup>H NMR (CDCl<sub>3</sub>/CD<sub>3</sub>OD) δ 3.0 (m, 12H, 6×CH<sub>2</sub>N), 3.5 (q, 4H, 2×CH<sub>2</sub>NHAr), 3.7 (t, 8H, 2×CH<sub>2</sub>Cl), 7.1 (s, 2H, ArH), 7.3 (s, 2H, ArH), 10.4 (t, 2H, 2×NHAr); IR ν<sub>max</sub> (KBr) cm<sup>-1</sup> 3600-3300 (OH), 1580 (C=O), 1230 (N-H); E<sub>λ</sub> (CH<sub>3</sub>OH/DMSO) = 8950 cm<sup>-1</sup>; λ<sub>max</sub> (673 nm); FAB-MS, m/z (M+H)<sup>+</sup> 607; Anal. (C<sub>26</sub>H<sub>32</sub>N<sub>4</sub>O<sub>4</sub>Cl<sub>4</sub> · 2HCl) C, H, N.

**1,4-Bis[[3-[bis(2-chloroethyl)amino]propyl]amino]-5,8-dihydroxyanthracene-9,10-dione dihydrochloride (13)**

Reaction conditions and procedure follow that for the synthesis of **16**, using **4** (0.05 g, 0.79 mmol), triphenylphosphine (0.124 g, 0.47 mmol) and carbon tetrachloride (0.288 g, 1.89 mmol). The product was isolated as a dark blue solid (44.7 mg, 81% yield). m.p. 205.1 - 206.5°C;  $^1\text{H}$  NMR ( $\text{CDCl}_3/\text{CD}_3\text{OD}$ )  $\delta$ : 2.2 (t, 4H,  $2\times\text{CH}_2\text{CH}_2\text{CH}_2$ ), 3.5 (t, 8H,  $4\times\text{CH}_2\text{N}$ ), 3.6 (t, 4H,  $2\times\text{CH}_2\text{N}$ ), 3.7 (q, 4H,  $2\times\text{CH}_2\text{NHAr}$ ), 3.9 (t, 8H,  $4\times\text{CH}_2\text{Cl}$ ), 7.1 (s, 2H, ArH), 7.3 (s, 2H, ArH), 10.6 (t, 2H,  $2\times\text{NHAr}$ ); IR  $\nu_{\text{max}}$  (KBr)  $\text{cm}^{-1}$  3600-3300 (OH), 1580 (C=O), 1230 (N-H);  $E_{\lambda}$  ( $\text{CH}_3\text{OH}/\text{DMSO}$ ) =  $9.125\text{ cm}^{-1}$ ;  $\lambda_{\text{max}}$  (675 nm); FAB-MS,  $m/z$  ( $\text{M}+\text{H}$ ) $^+$  635; Anal. ( $\text{C}_{28}\text{H}_{36}\text{N}_4\text{O}_4\text{Cl}_4 \cdot 2\text{HCl} \cdot 2\text{H}_2\text{O}$ ) C, H, N.

**1-[[3-[Bis(2-chloroethyl)amino]propyl]amino]anthracene-9,10-dione hydrochloride (14)**

Reaction procedure and conditions follow that for the synthesis of **12**, using **14a** (0.05 g, 0.136 mmol); triphenylphosphine (0.071 g, 0.27 mmol) and carbon tetrachloride (0.246 g, 1.62 mmol). The product was isolated as a red solid (48.0 mg, 80% yield). m.p. 194.5 - 196.5°C;  $^1\text{H}$  NMR ( $\text{CD}_3\text{OD}$ )  $\delta$ : 2.2 (m, 2H,  $\text{CH}_2\text{CH}_2\text{CH}_2$ ), 3.5 (t, 2H,  $\text{CH}_2\text{CH}_2\text{N}$ ), 3.54 (t, 2H,  $\text{CH}_2\text{CH}_2\text{N}$ ), 3.65 (t, 2H,  $\text{CH}_2\text{CH}_2\text{N}$ ), 3.7 (q, 2H,  $\text{CH}_2\text{NHAr}$ ), 4.0 (t, 4H,  $2\times\text{CH}_2\text{Cl}$ ), 7.3 (d, 1H, Ar-H), 7.7 (m, 2H, Ar-H), 7.8 (m, 2H, Ar-H), 8.2 (d, 1H, Ar-H); 8.3 (d, 1H, Ar-H); IR  $\nu_{\text{max}}$  (KBr)  $\text{cm}^{-1}$  3550-3310 (NRH), 1600 (C=O), 1230 (N-H);  $E_{\lambda}$  ( $\text{CH}_3\text{OH}/\text{DMSO}$ ) =  $7948\text{ cm}^{-1}$ ;  $\lambda_{\text{max}}$  (503 nm); FAB-MS,  $m/z$  ( $\text{M}+\text{H}$ ) $^+$  405; Anal. ( $\text{C}_{21}\text{H}_{22}\text{N}_2\text{O}_2\text{Cl}_2 \cdot 2\text{HCl}$ ) C, H, N.

**1-[[3-[Bis(2-hydroxyethyl)amino]propyl]amino]anthracene-9,10-dione (14a)**

To *N,N*-bis(2-hydroxyethyl)propanediamine (3.3 g, 20.0 mmol) in 2-methoxyethanol (10  $\text{cm}^3$ ) was added 1-chloroanthraquinone (0.5 g, 2.05 mmol) and the mixture was refluxed for 6h. On cooling, the reaction mixture was diluted with  $\text{CH}_2\text{Cl}_2$  (20  $\text{cm}^3$ ) and washed with water ( $3\times 20\text{ cm}^3$ ) to remove any unreacted amine. Following evaporation, the crude product was further purified by precipitation in  $\text{CH}_3\text{OH}$  with dry diethyl ether to give the target compound as a red powder (75.3 mg, 10.2% yield). m.p. 91.2 - 92.2 °C.  $^1\text{H}$  NMR ( $\text{CDCl}_3/\text{CD}_3\text{OD}$ ) peaks:  $\delta$  1.8 (m, 2H,  $\text{CH}_2\text{CH}_2\text{CH}_2$ ), 2.3 (t, 6H,  $3\times\text{CH}_2\text{N}$ ), 3.4 (q, 2H,  $\text{CH}_2\text{NHAr}$ ), 3.7 (t, 4H,  $2\times\text{CH}_2\text{OH}$ ), 7.0 (d, 1H, ArH), 7.5 (m, 2H, ArH), 7.7 (m, 2H, ArH), 8.2 (d, 1H, ArH), 8.3 (d, 1H, ArH), 10.1 (t, 2H, NHAr); FAB-MS,  $m/z$  ( $\text{M}+\text{H}$ ) $^+$  369; IR  $\nu_{\text{max}}$  (KBr)  $\text{cm}^{-1}$  3600-3300 (OH), 1650 (C=O), 1040 (N-H);  $E_{\lambda}$  ( $\text{MeOH}/\text{DMSO}$ ) =  $1961\text{ cm}^{-1}$ ;  $\lambda_{\text{max}}$  (510 nm).

**1,4-Bis[[2-[2-(chloroethyl)(methyl)amino]ethyl]amino]-5,8-dihydroxyanthracene-9,10-dione dihydrochloride (15)**

Reaction procedure and conditions follow that for the synthesis of **16**, using **6** (0.05 g, 0.11 mmol), triphenylphosphine (0.08 g, 0.32 mmol) and carbon tetrachloride (0.19 g, 1.2 mmol). The product was isolated as a dark blue solid (52.5 mg, 85% yield). m.p. 201.2 - 203.1°C;  $^1\text{H}$  NMR ( $\text{CDCl}_3/\text{CD}_3\text{OD}$ )  $\delta$ : 3.0 (s, 6H,  $2\times\text{CH}_3\text{N}$ ), 3.5 (t, 4H,  $2\times\text{CH}_2\text{NCH}_2$ ), 3.6 (t, 4H,  $2\times\text{CH}_2\text{NCH}_2$ ), 3.9 (q, 4H,  $2\times\text{CH}_2\text{NHAr}$ ), 3.9 (t, 4H,  $2\times\text{CH}_2\text{Cl}$ ), 7.2 (s, 2H, ArH), 7.4 (s, 2H, ArH), 10.6 (t, 2H,  $2\times\text{NHAr}$ ); IR  $\nu_{\text{max}}$  (KBr)  $\text{cm}^{-1}$  3600-3300 (OH), 1580 (C=O), 1230 (N-H);  $E_{\lambda}$  ( $\text{CH}_3\text{OH}/\text{DMSO}$ ) =  $27026\text{ cm}^{-1}$ ;  $\lambda_{\text{max}}$  (666 nm); FAB-MS,  $m/z$  ( $\text{M}+\text{H}$ ) $^+$  509; Anal. ( $\text{C}_{24}\text{H}_{30}\text{N}_4\text{O}_4\text{Cl}_2 \cdot 2\text{HCl} \cdot 2\text{H}_2\text{O}$ ) C, H, N.

**1,4-Bis[[2-[2-(chloroethyl)(methyl)amino]ethyl]amino]anthracene-9,10-dione dihydrochloride (16)**

Triphenylphosphine (0.086 g, 0.33 mmol), then carbon tetrachloride (0.15 g, 1.32 mmol) were added to a stirred solution of **3** (0.05 g, 0.11 mmol) in a mixture of  $\text{CH}_2\text{Cl}_2$  (4.0  $\text{cm}^3$ ) and  $\text{CH}_3\text{CN}$  (1.0  $\text{cm}^3$ ) under nitrogen. The resulting suspension was allowed to stir at room temperature for 48 hours. The crude product was precipitated by

the addition of dry ethereal hydrogen chloride, isolated by filtration and dried under vacuum. The solid residue was dissolved in a minimum quantity of  $\text{CH}_2\text{Cl}_2/\text{EtOH}$  (1:1) at  $60^\circ\text{C}$  and isolated from the triphenylphosphine oxide by-product and excess triphenylphosphine by precipitation with  $\text{EtOH}/\text{EtOAc}$  (1:1). The product was isolated as a dark blue solid (47.4 mg, 79% yield). m.p.  $185.4 - 186^\circ\text{C}$ ;  $^1\text{H}$  NMR ( $\text{CD}_3\text{OD}/\text{CDCl}_3$ )  $\delta$ : 3.1 (s, 6H,  $2\times\text{CH}_3\text{N}$ ), 3.6 (t, 4H,  $2\times\text{CH}_2\text{CH}_2\text{N}$ ), 3.7 (t, 4H,  $2\times\text{CH}_2\text{CH}_2\text{N}$ ), 3.9 (q, 4H,  $2\times\text{CH}_2\text{NHAr}$ ), 3.95 (t, 4H,  $2\times\text{CH}_2\text{Cl}$ ), 7.6 (s, 2H, Ar-H), 7.8 (m, 2H, Ar-H), 8.3 (m, 2H, Ar-H), 10.1 (t, 1H, NHAr); IR  $\nu_{\text{max}}$  (KBr)  $\text{cm}^{-1}$  3550-3310 (NRH), 1600 (C=O), 1230 (N-H);  $E_\lambda$  ( $\text{CH}_3\text{OH}/\text{DMSO}$ ) =  $12027\text{ cm}^{-1}$ ;  $\lambda_{\text{max}}$  (638 nm); FAB-MS,  $m/z$  ( $\text{M}+\text{H}$ ) $^+$  477; Anal. ( $\text{C}_{24}\text{H}_{30}\text{N}_4\text{O}_2\text{Cl}_2 \cdot 2\text{HCl} \cdot \text{H}_2\text{O}$ ) C, H, N.

**1-[[3-[2-(Chloroethyl)(methyl)amino]propyl]amino]anthracene-9,10-dione hydrochloride (17)**

Reaction procedure and conditions follow that for the synthesis of **12**, using **10** (0.05 g, 0.15 mmol), triphenylphosphine (0.078 g, 0.3 mmol) and carbon tetrachloride (0.137 g, 0.9 mmol). The product was isolated as a red solid (35.5 mg, 60%). m.p.  $205 - 207^\circ\text{C}$ ;  $^1\text{H}$  NMR ( $\text{CD}_3\text{OD}$ )  $\delta$ : 2.25 (m, 2H,  $\text{CH}_2\text{CH}_2\text{CH}_2$ ), 3.1 (s, 3H,  $\text{CH}_3\text{N}$ ), 3.4 (t, 2H,  $\text{CH}_2\text{CH}_2\text{N}$ ), 3.54 (t, 2H,  $\text{CH}_2\text{CH}_2\text{N}$ ), 3.7 (q, 2H,  $\text{CH}_2\text{NHAr}$ ), 4.0 (t, 2H,  $\text{CH}_2\text{Cl}$ ), 7.3 (d, 1H, Ar-H), 7.7 (m, 2H, Ar-H), 7.8 (m, 2H, Ar-H), 8.2 (d, 1H, Ar-H), 8.3 (d, 1H, Ar-H), 10.1 (t, 1H, NHAr); IR  $\nu_{\text{max}}$  (KBr)  $\text{cm}^{-1}$  3550-3310 (NRH), 1600 (C=O), 1230 (N-H);  $E_\lambda$  ( $\text{CH}_3\text{OH}/\text{DMSO}$ ) =  $1297.5\text{ cm}^{-1}$ ;  $\lambda_{\text{max}}$  (498 nm); FAB-MS,  $m/z$  ( $\text{M}+\text{H}$ ) $^+$  357; Anal. ( $\text{C}_{20}\text{H}_{19}\text{N}_2\text{O}_2\text{Cl} \cdot \text{HCl}$ ) C, H, N.

**1,4-Bis[[3-[bis(2-chloroethyl)amino]propyl]amino]anthracene-9,10-dione dihydrochloride (18)**

Reaction procedure and conditions follow that for the synthesis of **16**, using **2** (0.05 g, 0.095 mmol), triphenylphosphine (0.15 g, 0.57 mmol) and carbon tetrachloride (0.346 g, 2.28 mmol). The product was isolated as a dark blue solid (44.9 mg, 70% yield). m.p.  $187.2 - 188.9^\circ\text{C}$ ;  $^1\text{H}$  NMR ( $\text{CDCl}_3/\text{CD}_3\text{OD}$ )  $\delta$ : 2.2 (m, 4H,  $2\times\text{CH}_2\text{CH}_2\text{CH}_2$ ), 3.5 (t, 4H,  $2\times\text{CH}_2\text{N}$ ), 3.6 (t, 8H,  $4\times\text{CH}_2\text{N}$ ), 3.7 (q, 4H,  $\text{CH}_2\text{NHAr}$ ), 3.9 (t, 8H,  $4\times\text{CH}_2\text{Cl}$ ), 7.4 (s, 2H, Ar-H), 7.7 (m, 2H, Ar-H), 8.2 (m, 2H, Ar-H); IR  $\nu_{\text{max}}$  (KBr)  $\text{cm}^{-1}$  3550-3310 (NRH), 1600 (C=O), 1230 (N-H);  $E_\lambda$  ( $\text{CH}_3\text{OH}/\text{DMSO}$ ) =  $2171\text{ cm}^{-1}$ ;  $\lambda_{\text{max}}$  (642 nm); FAB-MS,  $m/z$  ( $\text{M}+\text{H}$ ) $^+$  603; Anal. ( $\text{C}_{28}\text{H}_{36}\text{N}_4\text{O}_2\text{Cl}_4 \cdot 2\text{HCl} \cdot 2\text{H}_2\text{O}$ ) C, H, N: C, 47.23, H, 5.95, N, 7.87. Found: C, 47.89, 6.35, 7.39.

**1,4-Bis[[2-[bis(2-chloroethyl)amino]ethyl]amino]anthracene-9,10-dione dihydrochloride (19)**

Reaction procedure and conditions follow that for the synthesis of **16**, using **1** (0.05 g, 0.09 mmol), triphenylphosphine (0.144 g, 0.5 mmol) and carbon tetrachloride (0.32 g, 2.1 mmol). The product was isolated as a dark blue solid (35.4 mg, 64% yield). m.p.  $194 - 196^\circ\text{C}$ ;  $^1\text{H}$  NMR ( $\text{CD}_3\text{OD}/\text{CDCl}_3$ )  $\delta$ : 3.6 (t, 4H,  $2\times\text{CH}_2\text{CH}_2\text{N}$ ), 3.64 (t, 8H,  $4\times\text{CH}_2\text{CH}_2\text{N}$ ), 3.9 (q, 4H,  $2\times\text{CH}_2\text{NHAr}$ ), 4.0 (t, 8H,  $4\times\text{CH}_2\text{Cl}$ ), 7.3 (d, 1H, Ar-H), 7.7 (m, 2H, Ar-H), 7.8 (m, 2H, Ar-H), 8.2 (d, 1H, Ar-H), 8.3 (d, 1H, Ar-H); IR  $\nu_{\text{max}}$  (KBr)  $\text{cm}^{-1}$  3550-3310 (NRH), 1600 (C=O), 1230 (N-H);  $E_\lambda$  ( $\text{CH}_3\text{OH}/\text{DMSO}$ ) =  $8570\text{ cm}^{-1}$ ;  $\lambda_{\text{max}}$  (638 nm); FAB-MS,  $m/z$  ( $\text{M}+\text{H}$ ) $^+$  575; Anal. ( $\text{C}_{26}\text{H}_{32}\text{N}_4\text{O}_2\text{Cl}_4 \cdot 2\text{HCl}$ ) C, H, N.

**1-[[2-[2-(Chloroethyl)(methyl)amino]ethyl]amino]anthracene-9,10-dione hydrochloride (20)**

Procedure as **16** using triphenylphosphine (0.16 g, 0.6 mmol), carbon tetrachloride (0.28 g, 1.8 mmol), **9** (0.1 g, 0.31 mmol) in  $\text{CH}_2\text{Cl}_2$  (5.0  $\text{cm}^3$ ). The product was isolated as a red solid (93.5 mg, 80% yield). m.p.  $207.1 - 209.2^\circ\text{C}$ ;  $^1\text{H}$  NMR

(CD<sub>3</sub>OD/CDCl<sub>3</sub>)  $\delta$ : 3.1 (s, 3H, CH<sub>3</sub>N), 3.5 (t, 2H, CH<sub>2</sub>CH<sub>2</sub>N), 3.7 (t, 2H, CH<sub>2</sub>CH<sub>2</sub>N), 3.9 (q, 2H, CH<sub>2</sub>NHAr), 3.95 (t, 2H, CH<sub>2</sub>Cl), 7.3 (d, 1H, Ar-*H*), 7.7 (m, 2H, Ar-*H*), 7.8 (m, 2H, Ar-*H*), 8.2 (d, 1H, Ar-*H*), 8.3 (d, 1H, Ar-*H*), 10.1 (t, 1H, NHAr); IR  $\nu_{\max}$  (KBr) cm<sup>-1</sup> 3550-3310 (NRH), 1600 (C=O), 1230 (N-H); E <sub>$\lambda$</sub>  (CH<sub>3</sub>OH/DMSO) = 6963 cm<sup>-1</sup>;  $\lambda_{\max}$  (488 nm); FAB-MS, m/z (M+H)<sup>+</sup> 343; Anal. (C<sub>19</sub>H<sub>19</sub>N<sub>2</sub>O<sub>2</sub>Cl·HCl) C, H, N.

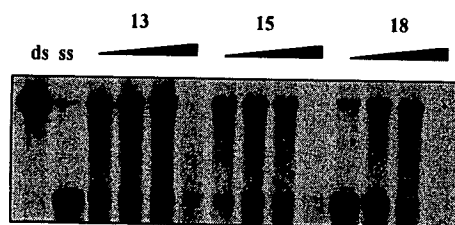

**Figure 1** Effect of **13**, **15** and **18** on supercoiled double stranded plasmid DNA strand separation. Concentration of chloroethylaminoanthraquinones (from left to right): 0.1, 1, 10, and 100 nM); ds = double stranded DNA, no drug; ss = single stranded DNA, no drug. See methods for full details.

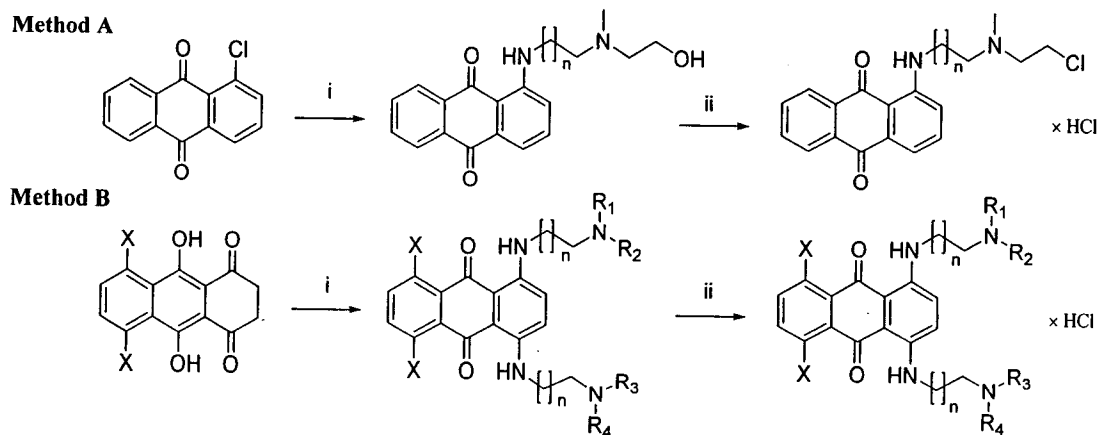

**Scheme 1** *Method A:* (i) *N*-alkyl-*N*-hydroxyalkylaminoalkylamine, reflux in 2-methoxyethanol, 6 h; (ii)  $\text{Ph}_3\text{P}-\text{CCl}_4$  in  $\text{CH}_2\text{Cl}_2/\text{CH}_3\text{CN}$  (4:1), rt, 48 h, hydrochloride salt made by the addition of ethereal hydrogen chloride. *Method B:* (i) leucoquinizarine ( $\text{X} = \text{H}$ ) or 5,8-dihydroxyleucoquinizarine ( $\text{X} = \text{OH}$ ) heated with appropriate *N*-alkyl-*N*-hydroxyalkylaminoalkylamine, 5h,  $\text{R}_1$ ,  $\text{R}_2$ ,  $\text{R}_3$ ,  $\text{R}_4 = \text{CH}_3$  or  $\text{CH}_2\text{CH}_2\text{OH}$ ,  $n = 1$  or  $2$ ); (ii) carried out as under step ii in method A,  $\text{R}_1$ ,  $\text{R}_2$ ,  $\text{R}_3$ ,  $\text{R}_4 = \text{CH}_3$  or  $\text{CH}_2\text{CH}_2\text{Cl}$ ,  $n = 1$  or  $2$ ). For specific structures, see Table 1.
